# Supplementary material for: Spatial-Temporal Population Dynamics of Male and Female Aedes Albopictus at a Local Scale in Medellín, Colombia
Source: Research Square preprint supplement (doi:10.21203/rs.3.rs-300583/v1), 2021-03-13
Supplement: Supplementary file 1 [file 8c1fd10856dce5e0af61fad1.xlsx]

## Sheet: Sheet1
		Ae. aegypti			Ae. albopictus
Climate Variable	Total Larvae	Male	Females	Both Sexes	Male	Females	Both Sexes
Precipitation	F= 10.04;	F= 18.47; p= 0.0002	F=11.93;p= 0.002	F= 15.66; p= 0.0006	F= 2.481; p= 0.129	F=4.257; p= 0.051	F= 3.299; p= 0.083
	p= 0.0045
Temperature	F= 4.08;	F= 4.103; p= 0.055	F= 1.49; p= 0.23	F= 2.691; p= 0.115	F= 1.745; p= 0.20	F= 2.65; p= 0.174	F= 2.18; p= 0.154
	p= 0.055
Temperature Max	F= 0.290;	F= 1.723; p= 0.202	F= 1.044; p= 0.318	F= 1.409; p= 0.247	F= 0.012; p= 0.912	F= 0.023; p= 0.878	F= 0.017; p= 0.895
	p= 0.5951
Temperature Min	F= 1.31;	F= 0.499; p= 0.487	F= 0.344; p= 0.563	F= 0.432; p= 0.517	F= 1.874; p= 0.184	F= 2.157; p= 0.156	F= 2.026; p= 0.168
	p= 0.263
Relative Humidity RH%	F=4.684;	F= 5.712; p= 0.0258	F= 3.589; p= 0.071	F= 4.748; p= 0.0403	F= 3.094; p= 0.092	F= 4.77; p= 0.039	F= 3.88; p= 0.061
	p= 0.0145
Wind Speed	F= 7.099;	F= 10.6; p= 0.0036	F=6.83; p=0.0158	F= 8.93; p=0.0067	F= 2.982; p= 0.098	F= 4.394; p= 0.049	F= 3.659; p= 0.068
	p= 0.0201
Atmospheric Pressure	F= 3.812;	F= 3.19; p= 0.087	F=2.826; p= 0.106	F= 3.11; p= 0.091	F= 0.240; p= 0.628	F= 0.492; p= 0.490	F= 0.355; p= 0.557
	p= 0.063
